# Supplementary material for: Unraveling the role of salt-sensitivity genes in obesity with integrated network biology and co-expression analysis
Source: PubMed Central journal article supplement (PMC7004317; doi:10.1371/journal.pone.0228400), 2020-02-06
Supplement: pone.0228400.s001.pdf [file pone.0228400.s001.pdf]

**S1 Table.** The list of samples and their characteristics used in the research analysis.

| <b>Sample</b> | <b>Tissue</b>           | <b>BMI</b> | <b>Age</b> | <b>Height (cm)</b> | <b>Weight (kg)</b> |
|---------------|-------------------------|------------|------------|--------------------|--------------------|
| GSM2349936    | Visceral Adipose Tissue | 23         | 18         | 160                | 58.3               |
| GSM2349937    | Visceral Adipose Tissue | 19         | 16         | 155                | 45.1               |
| GSM2349938    | Visceral Adipose Tissue | 25         | 19         | 162.5              | 68.3               |
| GSM2349939    | Visceral Adipose Tissue | 56         | 17         | 178                | 176                |
| GSM2349940    | Visceral Adipose Tissue | 22         | 13         | 157                | 53.4               |
| GSM2349941    | Visceral Adipose Tissue | 22         | 11         | 162                | 58.8               |
| GSM2349942    | Visceral Adipose Tissue | 24         | 17         | 173                | 72.1               |
| GSM2349943    | Visceral Adipose Tissue | 46.9       | 17         | 165.7              | 128.7              |
| GSM2349944    | Visceral Adipose Tissue | 19.6       | 16         | 157                | 48.2               |
| GSM2349945    | Visceral Adipose Tissue | 39.8       | 14         | 163                | 105.7              |
| GSM2349946    | Visceral Adipose Tissue | 37.8       | 15         | 159.4              | 96.1               |
| GSM2349947    | Visceral Adipose Tissue | 21.7       | 16         | 160.5              | 54.8               |
| GSM2349948    | Visceral Adipose Tissue | 15.9       | 12         | 150.75             | 36.1               |
| GSM2349949    | Visceral Adipose Tissue | 30.5       | 14         | 162                | 79.7               |
| GSM2349950    | Visceral Adipose Tissue | 62.5       | 17         | 157                | 154.1              |
| GSM2349951    | Visceral Adipose Tissue | 39.5       | 17         | 151.5              | 90.6               |
| GSM2349952    | Visceral Adipose Tissue | 23.4       | 15         | 168                | 66.2               |
| GSM2349953    | Visceral Adipose Tissue | 55.4       | 21         | 162                | 145.4              |
| GSM2349954    | Visceral Adipose Tissue | 56         | 14         | 158                | 140.4              |
| GSM2349955    | Visceral Adipose Tissue | 17.8       | 14         | 153                | 41.6               |
| GSM2349956    | Visceral Adipose Tissue | 41.7       | 17         | 159                | 105.5              |
| GSM2349957    | Visceral Adipose Tissue | 62         | 17         | 161                | 160.8              |
| GSM2349958    | Visceral Adipose Tissue | 24         | 14         | 165                | 65.4               |
| GSM2349959    | Visceral Adipose Tissue | 24.6       | 17         | 170                | 71.2               |
| GSM2349960    | Visceral Adipose Tissue | 21.8       | 16         | 162.6              | 57.6               |
| GSM2349961    | Visceral Adipose Tissue | 49.1       | 15         | 174                | 148.5              |

|            |                         |      |    |       |       |
|------------|-------------------------|------|----|-------|-------|
| GSM2349962 | Visceral Adipose Tissue | 46.4 | 16 | 147   | 100.3 |
| GSM2349963 | Visceral Adipose Tissue | 36.3 | 19 | 171   | 106   |
| GSM2349964 | Visceral Adipose Tissue | 45.5 | 18 | 165.2 | 127.5 |
| GSM2349965 | Visceral Adipose Tissue | 20   | 12 | 155   | 47.4  |
