# Supplementary material for: Unraveling the role of salt-sensitivity genes in obesity with integrated network biology and co-expression analysis
Source: PubMed Central journal article supplement (PMC7004317; doi:10.1371/journal.pone.0228400), 2020-02-06
Supplement: pone.0228400.s002.pdf [file pone.0228400.s002.pdf]

S2 Table: The list of Salt Sensitive Genes analyzed in the present study

| <b>Gene</b> | <b>Name</b>                                                                                         |
|-------------|-----------------------------------------------------------------------------------------------------|
| ACE         | angiotensin I converting enzyme                                                                     |
| ACE2        | angiotensin I converting enzyme 2                                                                   |
| ADD1        | adducin 1                                                                                           |
| ADRB2       | adrenoceptor beta 2                                                                                 |
| AGT         | angiotensinogen                                                                                     |
| AGTR1       | angiotensin II receptor type 1                                                                      |
| AGTR2       | angiotensin II receptor type 2                                                                      |
| ANPEP       | alanyl aminopeptidase, membrane                                                                     |
| ATP6AP2     | ATPase H <sup>+</sup> transporting accessory protein 2                                              |
| CLCNKB      | chloride voltage-gated channel Kb                                                                   |
| CMA1        | chymase 1                                                                                           |
| CPA3        | carboxypeptidase A3                                                                                 |
| CTSA        | cathepsin A                                                                                         |
| CTSG        | cathepsin G                                                                                         |
| CYP11B1     | cytochrome P450 family 11 subfamily B member 1                                                      |
| CYP11B2     | cytochrome P450 family 11 subfamily B member 2                                                      |
| CYP17A1     | cytochrome P450 family 17 subfamily A member 1                                                      |
| CYP3A5      | cytochrome P450 family 3 subfamily A member 5                                                       |
| ENPEP       | glutamyl aminopeptidase                                                                             |
| GNAI2       | G protein subunit alpha i2                                                                          |
| GNB3        | G protein subunit beta 3                                                                            |
| GRK4        | G protein-coupled receptor kinase 4                                                                 |
| HSD11B2     | hydroxysteroid 11-beta dehydrogenase 2                                                              |
| KCNJ1       | potassium voltage-gated channel subfamily J member 1                                                |
| KLK1        | kallikrein 1                                                                                        |
| KLK2        | kallikrein related peptidase 2                                                                      |
| LNPEP       | leucyl and cystinyl aminopeptidase                                                                  |
| MAS1        | MAS1 proto-oncogene, G protein-coupled receptor                                                     |
| MME         | membrane metalloendopeptidase                                                                       |
| SLC24A3     | solute carrier family 24 member 3                                                                   |
| SLC8A1      | solute carrier family 8 member A1                                                                   |
| NEDD4L      | neural precursor cell expressed, developmentally down-regulated 4-like, E3 ubiquitin protein ligase |
| NLN         | neurolysin                                                                                          |
| PRCP        | prolylcarboxypeptidase                                                                              |
| PREP        | prolyl endopeptidase                                                                                |
| PRKG1       | protein kinase cGMP-dependent 1                                                                     |
| REN         | renin                                                                                               |
| SCNN1A      | sodium channel epithelial 1 alpha subunit                                                           |

|        |                                           |
|--------|-------------------------------------------|
| SCNN1B | sodium channel epithelial 1 beta subunit  |
| SCNN1D | sodium channel epithelial 1 delta subunit |
| SCNN1G | sodium channel epithelial 1 gamma subunit |
| SGK1   | serum/glucocorticoid regulated kinase 1   |
| SLC4A4 | solute carrier family 4 member 4          |
| SLC4A5 | solute carrier family 4 member 5          |
| TH     | tyrosine hydroxylase                      |
| THOP1  | thimet oligopeptidase 1                   |
| WNK1   | WNK lysine deficient protein kinase 1     |
